# Supplementary material for: The iFlow modelling framework v2.4: a modular idealized process-based model for flow and transport in estuaries
Source: Copernicus journal article supplement (doi:10.5194/gmd-10-2691-2017), 2017-07-14
Supplement: Supplementary file [file gmd-10-2691-2017-supplement-title-page.pdf › gmd-10-2691-2017-supplement-title-page.pdf]

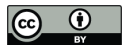

## *Supplement of*

# **The iFlow modelling framework v2.4: a modular idealized process-based model for flow and transport in estuaries**

**Yoei M. Dijkstra et al.**

*Correspondence to:* Yoei M. Dijkstra ([y.m.dijkstra@tudelft.nl](mailto:y.m.dijkstra@tudelft.nl))

- [gmd-10-2691-2017-supplement-title-page.pdf](#)
- [Package analytical2DV manual.pdf](#)
- [Package general manual.pdf](#)
- [Package numerical2DV manual.pdf](#)
- [Package semianalytical2DV manual.pdf](#)
- [iFlow modelling framework manual.pdf](#)

The copyright of individual parts of the supplement might differ from the CC BY 3.0 License.
